# Supplementary material
Source: PubMed Central journal article supplement (PMC3478306)
Supplement: cc-11-3555-s01.pdf [file cc-11-3555-s01.pdf]

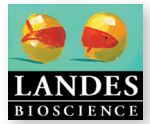

## **Supplemental Material to:**

**Maria Ana Gomez-Ferreria, Mikhail Bashkurov,  
Michael Mullin, Anne-Claude Gingras and  
Laurence Pelletier**

**CEP192 interacts physically and functionally with the K63-  
deubiquitinase CYLD to promote mitotic spindle assembly**

**2012; 11(19)**

**<http://dx.doi.org/10.4161/cc.21574>**

**<http://www.landesbioscience.com/journals/cc/article/21574>**

## SUPPLEMENTARY FIGURE LEGENDS

**Fig S1. CEP192 interactome.** FLAG-CEP192 expressed in HEK293 cells was immunoprecipitated and the purified proteins were identified by mass spectrometry. As a negative control, we transfected FLAG-HAUS4 or FLAG alone (data not shown). List of protein interactions found in at least 2 out of 3 biological replicates and filtered for: maximum frequency across the database = 5% (database contains ~2000 experiments), minimum number of unique peptides in at least one of the experiments = 2. None of the hits was detected in the control samples. The numbers listed in the columns represent the total peptide number (spectral counts) for each hit across the 3 experiments (E1, E2, E3).

**Fig S2. CYLD co-depletion rescues bipolar spindle assembly in CEP192-deficient cells.** **A.** Quantification of the spindle phenotypes observed in HeLa cells transfected with the indicated siRNA. We show the average and s.d. of at least 3 experiments. **B.** Quantification of CEP192 centrosomal levels in cells transfected with the indicated siRNA. Each dot represents a cell where CEP192 signal and spindle morphology were scored. The horizontal lines in the graph mark the range of comparable depleted levels of CEP192 that we consider for the quantifications in Fig S2C. We show one representative experiment out of five. **C.** Quantification of the spindle phenotypes observed in cells with comparable CEP192 depleted levels (measured as in Fig 2D for the esiRNAs and Fig S2B for the siRNAs). We show the average and s.d. of 5 independent experiments. **D.** Possible model explaining the antagonism between CEP192 and CYLD in mitosis. I, CYLD promotes microtubule polymerization/stabilization in interphase. II, at the onset of mitosis, CYLD is inhibited by CEP192 to achieve a complete de-polymerization of the interphase array of microtubules and/or preserve ubiquitination of CYLD substrates. III,

additionally, CEP192 regulates centrosome maturation and possibly microtubule nucleation by activating NEDD1.

#### **SUPPLEMENTARY TABLE**

**Table S1: CEP192 interactome.** List of CEP192 interacting proteins identified by Mass Spectrometry. Interactions were filtered to enable a maximum frequency across the database of 5%.

Figure S1

|                | E1  | E2  | E3  |
|----------------|-----|-----|-----|
| <b>CEP192</b>  | 536 | 244 | 786 |
| <b>RBM12B</b>  | 15  | 13  | 32  |
| <b>PJA2</b>    | 14  | 2   | 9   |
| <b>CYLD</b>    | 16  | 1   | 3   |
| <b>NEDD1</b>   | 9   | 3   | 2   |
| <b>CEP85</b>   | 6   | 3   | 5   |
| <b>BNIP3L</b>  | 4   | 2   | 6   |
| <b>SDCCAG8</b> | 3   | 5   | 3   |
| <b>ALMS1</b>   | 4   | 2   | -   |
| <b>ZBTB10</b>  | 1   | -   | 3   |

Figure S2

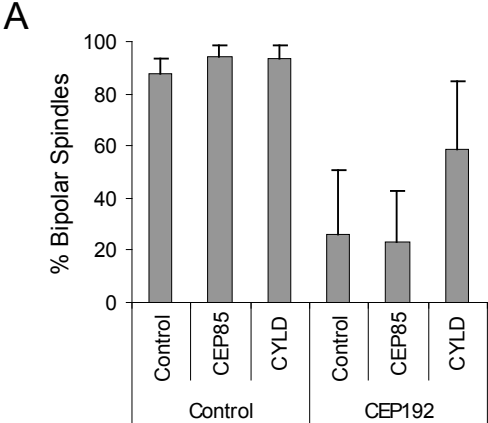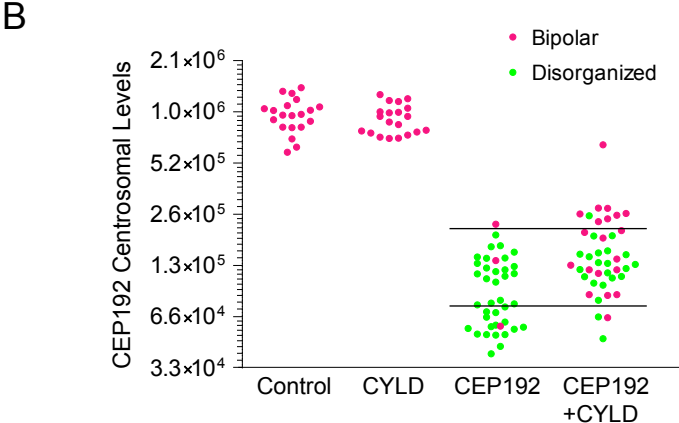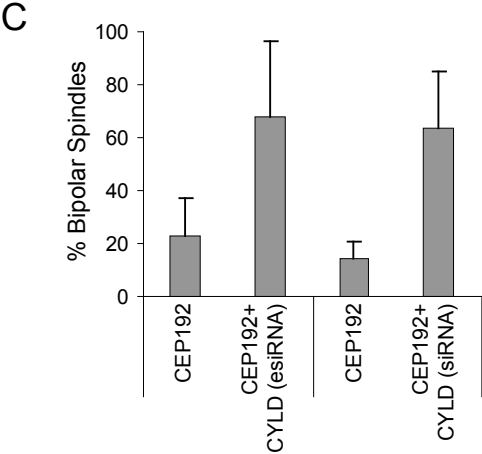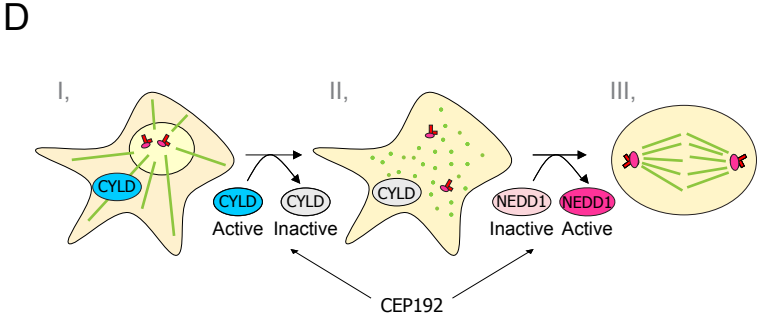

Bait Gene Name: CEP192

Bait Gene ID: 55125

Filter: Project Frequency > 5

Yellow background marks the hits selected in Fig 1A and S1

Additional filters: Shared frequency < 67

Unique peptide < 2 in all experiments

| Experiment | Hit Gene Name | Hit Gene ID | Hit Protein ID | Hit Score | Peptide Number | Unique Peptide Number | Coverage | Frequency (in database) | Shared Frequency |
|------------|---------------|-------------|----------------|-----------|----------------|-----------------------|----------|-------------------------|------------------|
| Exp 1      | CEP192        | 55125       | 255003833      | 5041      | 536            | 93                    | 38.7     | 3.5                     | 100              |
| Exp 2      | CEP192        | 55125       | 255003833      | 3045      | 244            | 57                    | 26.4     | 3.5                     | 100              |
| Exp 3      | CEP192        | 55125       | 255003833      | 6287      | 786            | 115                   | 40.4     | 3.5                     | 100              |
| Exp 1      | 56160532      | 56160532    | 56160532       | 428       | 20             | 8                     | 19.8     |                         | 100              |
| Exp 2      | 56160532      | 56160532    | 56160532       | 191       | 7              | 4                     | 10.5     |                         | 100              |
| Exp 3      | 56160532      | 56160532    | 56160532       | 579       | 47             | 10                    | 23.6     |                         | 100              |
| Exp 1      | RBM12B        | 389677      | 118722349      | 422       | 15             | 11                    | 11.2     | 4.1                     | 100              |
| Exp 2      | RBM12B        | 389677      | 118722349      | 334       | 13             | 8                     | 7.8      | 4.1                     | 100              |
| Exp 3      | RBM12B        | 389677      | 118722349      | 668       | 32             | 17                    | 18       | 4.1                     | 100              |
| Exp 1      | PJA2          | 9867        | 157412255      | 399       | 14             | 6                     | 11.9     | 2.5                     | 100              |
| Exp 2      | PJA2          | 9867        | 157412255      | 59        | 2              | 1                     | 1.6      | 2.5                     | 100              |
| Exp 3      | PJA2          | 9867        | 157412255      | 254       | 9              | 5                     | 8.8      | 2.5                     | 100              |
| Exp 1      | CYLD          | 1540        | 14165258       | 356       | 16             | 7                     | 9.3      | 1.9                     | 100              |
| Exp 2      | CYLD          | 1540        | 14165258       | 39        | 1              | 1                     | 1.3      | 1.9                     | 100              |
| Exp 3      | CYLD          | 1540        | 14165258       | 158       | 3              | 3                     | 4        | 1.9                     | 100              |
| Exp 1      | NEDD1         | 121441      | 206597470      | 335       | 9              | 5                     | 9.8      | 2.5                     | 100              |
| Exp 2      | NEDD1         | 121441      | 206597470      | 103       | 3              | 2                     | 3.7      | 2.5                     | 100              |
| Exp 3      | NEDD1         | 121441      | 206597470      | 41        | 2              | 1                     | 2.1      | 2.5                     | 100              |
| Exp 1      | CEP85         | 64793       | 40538794       | 193       | 6              | 5                     | 9.3      | 1.9                     | 100              |
| Exp 2      | CEP85         | 64793       | 40538794       | 95        | 3              | 2                     | 3        | 1.9                     | 100              |
| Exp 3      | CEP85         | 64793       | 40538794       | 232       | 5              | 4                     | 5.5      | 1.9                     | 100              |
| Exp 1      | SDCCAG8       | 10806       | 28269672       | 130       | 3              | 3                     | 5.6      | 1.6                     | 100              |
| Exp 2      | SDCCAG8       | 10806       | 28269672       | 139       | 5              | 4                     | 4.6      | 1.6                     | 100              |
| Exp 3      | SDCCAG8       | 10806       | 28269672       | 67        | 3              | 1                     | 1.1      | 1.6                     | 100              |
| Exp 1      | BNIP3L        | 665         | 4757860        | 73        | 4              | 1                     | 6.8      | 0.6                     | 100              |
| Exp 2      | BNIP3L        | 665         | 4757860        | 46        | 2              | 1                     | 6.8      | 0.6                     | 100              |
| Exp 3      | BNIP3L        | 665         | 4757860        | 122       | 6              | 2                     | 15.1     | 0.6                     | 100              |
| Exp 1      | FOXO3         | 2309        | 4503739        | 36        | 3              | 1                     | 1.2      | 2.2                     | 100              |
| Exp 2      | FOXO3         | 2309        | 4503739        | 32        | 1              | 1                     | 1.2      | 2.2                     | 100              |
| Exp 3      | FOXO3         | 2309        | 4503739        | 32        | 1              | 1                     | 1.2      | 2.2                     | 100              |
| Exp 1      | ALMS1         | 7840        | 110349786      | 92        | 4              | 3                     | 0.9      | 3.8                     | 67               |

|       |          |        |           |     |    |   |     |     |    |
|-------|----------|--------|-----------|-----|----|---|-----|-----|----|
| Exp 2 | ALMS1    | 7840   | 110349786 | 48  | 2  | 2 | 0.5 | 3.8 | 67 |
| Exp 1 | SPATA2L  | 124044 | 31377585  | 92  | 2  | 1 | 3.5 | 0.3 | 67 |
| Exp 3 | SPATA2L  | 124044 | 31377585  | 46  | 1  | 1 | 1.9 | 0.3 | 67 |
| Exp 1 | LATS2    | 26524  | 126507091 | 33  | 1  | 1 | 0.9 | 1.3 | 67 |
| Exp 3 | LATS2    | 26524  | 126507091 | 33  | 2  | 1 | 0.9 | 1.3 | 67 |
| Exp 1 | UTP23    | 84294  | 223468687 | 32  | 1  | 1 | 5.6 |     | 67 |
| Exp 2 | UTP23    | 84294  | 223468687 | 29  | 1  | 1 | 5.6 |     | 67 |
| Exp 1 | PRDM1    | 639    | 172072684 | 31  | 4  | 1 | 1   | 0.6 | 67 |
| Exp 3 | PRDM1    | 639    | 172072684 | 35  | 3  | 1 | 1   | 0.6 | 67 |
| Exp 1 | ZBTB10   | 65986  | 157694497 | 31  | 1  | 1 | 2.4 | 1.9 | 67 |
| Exp 3 | ZBTB10   | 65986  | 157694497 | 120 | 3  | 2 | 6.5 | 1.9 | 67 |
| Exp 1 | CCDC160  | 347475 | 157427195 | 31  | 2  | 1 | 3.1 | 0.6 | 67 |
| Exp 3 | CCDC160  | 347475 | 157427195 | 35  | 6  | 1 | 3.1 | 0.6 | 67 |
| Exp 1 | MDM1     | 56890  | 9910418   | 31  | 4  | 1 | 3.2 | 0.6 | 67 |
| Exp 3 | MDM1     | 56890  | 9910418   | 44  | 19 | 1 | 3.2 | 0.6 | 67 |
| Exp 1 | SMYD5    | 10322  | 154689858 | 30  | 2  | 1 | 1.9 | 1.6 | 67 |
| Exp 3 | SMYD5    | 10322  | 154689858 | 33  | 2  | 1 | 1.9 | 1.6 | 67 |
| Exp 1 | NBAS     | 51594  | 41393547  | 29  | 1  | 1 | 0.4 | 2.8 | 67 |
| Exp 3 | NBAS     | 51594  | 41393547  | 44  | 4  | 1 | 0.5 | 2.8 | 67 |
| Exp 1 | CHD1L    | 9557   | 373432615 | 29  | 1  | 1 | 1   | 3.1 | 67 |
| Exp 3 | CHD1L    | 9557   | 373432617 | 37  | 1  | 1 | 1.8 | 3.1 | 67 |
| Exp 1 | TNRC6A   | 27327  | 116805348 | 29  | 2  | 1 | 0.5 | 4.4 | 67 |
| Exp 3 | TNRC6A   | 27327  | 116805348 | 82  | 5  | 1 | 1.4 | 4.4 | 67 |
| Exp 1 | KLHL8    | 57563  | 34101268  | 29  | 1  | 1 | 1.6 | 0.3 | 67 |
| Exp 3 | KLHL8    | 57563  | 34101268  | 29  | 1  | 1 | 1.6 | 0.3 | 67 |
| Exp 1 | SLC1A1   | 6505   | 66773030  | 28  | 2  | 1 | 2.5 |     | 67 |
| Exp 2 | SLC1A1   | 6505   | 66773030  | 28  | 1  | 1 | 2.5 |     | 67 |
| Exp 1 | ZNF845   | 91664  | 210031219 | 27  | 1  | 1 | 0.8 | 0.6 | 67 |
| Exp 2 | ZNF845   | 91664  | 210031219 | 26  | 1  | 1 | 0.9 | 0.6 | 67 |
| Exp 1 | MTUS2    | 23281  | 140161498 | 25  | 1  | 1 | 0.6 | 1.3 | 67 |
| Exp 2 | MTUS2    | 23281  | 140161498 | 28  | 1  | 1 | 0.7 | 1.3 | 67 |
| Exp 2 | UBN2     | 254048 | 236459851 | 38  | 2  | 1 | 0.7 | 2.5 | 67 |
| Exp 3 | UBN2     | 254048 | 236459851 | 38  | 4  | 1 | 0.7 | 2.5 | 67 |
| Exp 2 | C4orf19  | 55286  | 157388979 | 33  | 1  | 1 | 4.1 |     | 67 |
| Exp 3 | C4orf19  | 55286  | 157388979 | 29  | 1  | 1 | 4.1 |     | 67 |
| Exp 1 | ITGA11   | 22801  | 52485853  | 91  | 3  | 1 | 2.2 | 0.9 | 33 |
| Exp 1 | TMEM106C | 79022  | 219802797 | 73  | 2  | 2 | 7.4 | 0.9 | 33 |
| Exp 1 | IKBKB    | 3551   | 299758411 | 71  | 6  | 1 | 2.9 | 1.3 | 33 |
| Exp 1 | SERPINA3 | 12     | 50659080  | 69  | 2  | 1 | 2.6 | 0.6 | 33 |
| Exp 1 | TSGA10   | 80705  | 13376858  | 68  | 5  | 1 | 1.9 | 3.8 | 33 |
| Exp 1 | INTS2    | 57508  | 24308211  | 68  | 2  | 1 | 1.7 | 3.8 | 33 |

|       |           |        |           |    |   |   |     |     |    |
|-------|-----------|--------|-----------|----|---|---|-----|-----|----|
| Exp 1 | RAB5A     | 5868   | 19923262  | 65 | 2 | 2 | 4.7 | 2.5 | 33 |
| Exp 1 | KBTBD8    | 84541  | 227497736 | 61 | 3 | 2 | 2   | 0.3 | 33 |
| Exp 1 | OR56A4    | 120793 | 94967016  | 60 | 3 | 1 | 4.4 |     | 33 |
| Exp 1 | SLFN5     | 162394 | 145580600 | 58 | 2 | 1 | 2.4 | 0.6 | 33 |
| Exp 1 | JAKMIP2   | 9832   | 45237195  | 56 | 2 | 2 | 2.6 | 4.1 | 33 |
| Exp 1 | ITGAM     | 3684   | 88501734  | 56 | 2 | 1 | 1.4 | 1.3 | 33 |
| Exp 1 | DOCK5     | 80005  | 117553586 | 56 | 2 | 1 | 1.1 | 1.9 | 33 |
| Exp 1 | MPHOSPH10 | 10199  | 31317305  | 56 | 2 | 1 | 2.3 | 3.1 | 33 |
| Exp 1 | COL5A1    | 1289   | 89276751  | 54 | 2 | 2 | 1.1 | 3.5 | 33 |
| Exp 1 | GHITM     | 27069  | 118200356 | 45 | 1 | 1 | 2   | 1.3 | 33 |
| Exp 1 | LRTM2     | 654429 | 84781739  | 43 | 2 | 1 | 1.9 | 1.3 | 33 |
| Exp 1 | ATF4      | 468    | 33469974  | 42 | 1 | 1 | 1.7 | 0.6 | 33 |
| Exp 1 | ADCY3     | 109    | 148536830 | 42 | 1 | 1 | 0.7 | 1.3 | 33 |
| Exp 1 | FAM19A3   | 284467 | 33300649  | 41 | 1 | 1 | 7.5 | 0.3 | 33 |
| Exp 1 | MS4A10    | 341116 | 167466260 | 40 | 1 | 1 | 3   |     | 33 |
| Exp 1 | LYRM1     | 57149  | 10092683  | 40 | 3 | 1 | 6.6 | 0.3 | 33 |
| Exp 1 | PTPRZ1    | 5803   | 332205943 | 40 | 1 | 1 | 0.9 | 0.6 | 33 |
| Exp 1 | SCGB3A1   | 92304  | 50363226  | 40 | 1 | 1 | 6.7 |     | 33 |
| Exp 1 | FAM158A   | 51016  | 31542298  | 40 | 3 | 1 | 3.4 | 0.3 | 33 |
| Exp 1 | FCRL4     | 83417  | 14550416  | 38 | 3 | 1 | 1.4 | 0.6 | 33 |
| Exp 1 | CLEC2B    | 9976   | 37577107  | 37 | 1 | 1 | 5.4 |     | 33 |
| Exp 1 | FAM161A   | 84140  | 187936946 | 37 | 1 | 1 | 1.5 | 0.6 | 33 |
| Exp 1 | FRMPD2    | 143162 | 372326076 | 37 | 1 | 1 | 4.1 | 1.3 | 33 |
| Exp 1 | BBS12     | 166379 | 40217788  | 37 | 1 | 1 | 1   | 0.6 | 33 |
| Exp 1 | XPA       | 7507   | 4507937   | 36 | 1 | 1 | 4.8 | 0.9 | 33 |
| Exp 1 | DIO3      | 1735   | 255958313 | 36 | 1 | 1 | 3   | 0.3 | 33 |
| Exp 1 | FAM131B   | 9715   | 164519061 | 35 | 1 | 1 | 3.3 | 0.3 | 33 |
| Exp 1 | NPEPL1    | 79716  | 325652114 | 35 | 1 | 1 | 2.2 |     | 33 |
| Exp 1 | TFEC      | 22797  | 347360943 | 35 | 1 | 1 | 2.9 | 1.3 | 33 |
| Exp 1 | FITM2     | 128486 | 122937337 | 35 | 1 | 1 | 4.2 |     | 33 |
| Exp 1 | FAM162A   | 26355  | 49355721  | 35 | 1 | 1 | 5.2 | 0.9 | 33 |
| Exp 1 | INTS7     | 25896  | 7661566   | 35 | 1 | 1 | 0.7 | 4.1 | 33 |
| Exp 1 | SULT1A1   | 6817   | 29540531  | 35 | 1 | 1 | 3.1 | 2.2 | 33 |
| Exp 1 | ANKRD52   | 283373 | 157743284 | 34 | 1 | 1 | 0.8 | 0.9 | 33 |
| Exp 1 | ALLC      | 55821  | 144953901 | 34 | 1 | 1 | 2   | 2.2 | 33 |
| Exp 1 | NME7      | 29922  | 37574614  | 34 | 2 | 1 | 2.4 | 0.6 | 33 |
| Exp 1 | TMEM56    | 148534 | 22749023  | 34 | 1 | 1 | 3   | 0.3 | 33 |
| Exp 1 | TRPM1     | 4308   | 94538366  | 34 | 1 | 1 | 0.6 | 2.5 | 33 |
| Exp 1 | C15orf56  | 644809 | 90017700  | 33 | 1 | 1 | 5.6 | 0.6 | 33 |
| Exp 1 | TRADD     | 8717   | 13378137  | 33 | 1 | 1 | 5.1 | 0.6 | 33 |
| Exp 1 | TSPAN12   | 23554  | 6912528   | 33 | 1 | 1 | 4.6 |     | 33 |



|       |          |           |           |    |   |   |     |     |    |
|-------|----------|-----------|-----------|----|---|---|-----|-----|----|
| Exp 1 | CX3CL1   | 6376      | 4506857   | 33 | 1 | 1 | 1.8 |     | 33 |
| Exp 1 | CLDN9    | 9080      | 11141861  | 33 | 1 | 1 | 5.5 |     | 33 |
| Exp 1 | NBL1     | 4681      | 323276673 | 33 | 1 | 1 | 4.4 | 0.3 | 33 |
| Exp 1 | CARD8    | 22900     | 296531357 | 33 | 1 | 1 | 2.2 |     | 33 |
| Exp 1 | OR5M1    | 390168    | 52317124  | 33 | 1 | 1 | 3.5 |     | 33 |
| Exp 1 | C9orf133 | 548324    | 341914811 | 33 | 1 | 1 | 5.6 |     | 33 |
| Exp 1 | ZNF7     | 7553      | 4508035   | 33 | 1 | 1 | 1.6 | 0.9 | 33 |
| Exp 1 | F2RL1    | 2150      | 34577052  | 33 | 1 | 1 | 2   | 0.3 | 33 |
| Exp 1 | TTC39B   | 158219    | 270265883 | 33 | 1 | 1 | 1.3 | 1.9 | 33 |
| Exp 1 | CREB3L4  | 148327    | 364023829 | 33 | 1 | 1 | 1.9 | 0.6 | 33 |
| Exp 1 | C8orf73  | 642475    | 154937380 | 33 | 1 | 1 | 1.8 | 1.3 | 33 |
| Exp 1 | SLC25A40 | 55972     | 46094065  | 33 | 1 | 1 | 2.1 |     | 33 |
| Exp 1 | SERTM1   | 400120    | 155969691 | 33 | 1 | 1 | 8.4 |     | 33 |
| Exp 1 | ZNF519   | 162655    | 289666793 | 33 | 1 | 1 | 1.7 |     | 33 |
| Exp 1 | RCAN3    | 11123     | 354623074 | 33 | 1 | 1 | 5.8 | 0.3 | 33 |
| Exp 1 | SPATA25  | 128497    | 18129630  | 32 | 2 | 1 | 2.6 |     | 33 |
| Exp 1 | ZNF689   | 115509    | 34147544  | 32 | 1 | 1 | 2   |     | 33 |
| Exp 1 | WDR62    | 284403    | 145580608 | 32 | 1 | 1 | 0.5 | 2.8 | 33 |
| Exp 1 | NAE1     | 8883      | 66363686  | 32 | 1 | 1 | 1.3 | 2.8 | 33 |
| Exp 1 | TPPP     | 11076     | 5902018   | 32 | 1 | 1 | 5.9 | 0.3 | 33 |
| Exp 1 | CYB5R1   | 51706     | 49574502  | 32 | 1 | 1 | 2.3 |     | 33 |
| Exp 1 | PARD3B   | 117583    | 119120897 | 32 | 1 | 1 | 1.2 | 2.8 | 33 |
| Exp 1 | OLFML2A  | 169611    | 116014339 | 32 | 1 | 1 | 1.2 | 0.6 | 33 |
| Exp 1 | CTBS     | 1486      | 4758092   | 32 | 1 | 1 | 1.8 | 0.3 | 33 |
| Exp 1 | FAM196B  | 100131897 | 193788653 | 32 | 1 | 1 | 2.2 | 0.6 | 33 |
| Exp 1 | ANKLE2   | 23141     | 148664230 | 32 | 1 | 1 | 0.7 | 4.1 | 33 |
| Exp 1 | SCAF1    | 58506     | 226509740 | 32 | 1 | 1 | 1.2 | 3.5 | 33 |
| Exp 1 | ABI3BP   | 25890     | 33667044  | 32 | 1 | 1 | 1   | 2.5 | 33 |
| Exp 1 | GPR108   | 56927     | 122937301 | 32 | 1 | 1 | 2.6 | 0.3 | 33 |
| Exp 1 | AIFM3    | 150209    | 21389617  | 32 | 1 | 1 | 1.5 | 2.8 | 33 |
| Exp 1 | CCDC28A  | 25901     | 27414491  | 32 | 1 | 1 | 4   | 0.6 | 33 |
| Exp 1 | WDR5B    | 54554     | 23199987  | 32 | 1 | 1 | 2.4 | 0.6 | 33 |
| Exp 1 | SPIC     | 121599    | 22748707  | 32 | 1 | 1 | 2.8 |     | 33 |
| Exp 1 | MRGPRX4  | 117196    | 239582753 | 32 | 1 | 1 | 1.9 | 1.6 | 33 |
| Exp 1 | CES5A    | 221223    | 298231153 | 31 | 1 | 1 | 1.8 | 0.3 | 33 |
| Exp 1 | CERS1    | 10715     | 38176296  | 31 | 1 | 1 | 3   | 0.3 | 33 |
| Exp 1 | FABP9    | 646480    | 122937490 | 31 | 1 | 1 | 7.6 | 0.3 | 33 |
| Exp 1 | TRHDE    | 29953     | 7019561   | 31 | 1 | 1 | 1.1 | 0.3 | 33 |
| Exp 1 | REV1     | 51455     | 7706681   | 31 | 1 | 1 | 1.1 | 1.3 | 33 |
| Exp 1 | DCLK3    | 85443     | 149589021 | 31 | 1 | 1 | 1.7 | 0.3 | 33 |
| Exp 1 | TMCC2    | 9911      | 339275845 | 31 | 2 | 1 | 1.3 | 2.2 | 33 |

|       |          |        |           |    |   |   |     |     |    |
|-------|----------|--------|-----------|----|---|---|-----|-----|----|
| Exp 1 | HDGFRP3  | 50810  | 7705320   | 31 | 1 | 1 | 4.9 | 1.3 | 33 |
| Exp 1 | SMAD7    | 4092   | 299890807 | 31 | 1 | 1 | 3.8 | 0.9 | 33 |
| Exp 1 | ZNF648   | 127665 | 58000461  | 31 | 1 | 1 | 1.2 |     | 33 |
| Exp 1 | PNPLA8   | 50640  | 365192579 | 31 | 2 | 1 | 1.6 | 1.6 | 33 |
| Exp 1 | SIGLEC10 | 89790  | 283837888 | 31 | 1 | 1 | 1.8 | 1.6 | 33 |
| Exp 1 | TMEM120B | 144404 | 212720630 | 31 | 2 | 1 | 3.5 |     | 33 |
| Exp 1 | AADAT    | 51166  | 7705897   | 31 | 1 | 1 | 3.1 | 0.6 | 33 |
| Exp 1 | APLP1    | 333    | 4885065   | 31 | 1 | 1 | 1.1 | 2.5 | 33 |
| Exp 1 | SPAG16   | 79582  | 70887780  | 31 | 1 | 1 | 4.4 | 0.9 | 33 |
| Exp 1 | WWC3     | 55841  | 38570149  | 30 | 2 | 1 | 1   | 2.5 | 33 |
| Exp 1 | 5-Sep    | 5413   | 9945439   | 30 | 1 | 1 | 1.9 | 0.6 | 33 |
| Exp 1 | CRH      | 1392   | 4503041   | 30 | 1 | 1 | 6.1 |     | 33 |
| Exp 1 | SLC39A4  | 55630  | 115430255 | 30 | 1 | 1 | 1.1 | 0.6 | 33 |
| Exp 1 | LRRC2    | 79442  | 190014581 | 30 | 1 | 1 | 1.9 |     | 33 |
| Exp 1 | UBA6     | 55236  | 150417996 | 30 | 1 | 1 | 1.1 | 1.9 | 33 |
| Exp 1 | DBF4     | 10926  | 5729734   | 30 | 1 | 1 | 1   | 1.9 | 33 |
| Exp 1 | FOXM1    | 2305   | 42544161  | 30 | 1 | 1 | 1.1 | 0.3 | 33 |
| Exp 1 | WRAP53   | 55135  | 221136854 | 30 | 1 | 1 | 1.8 |     | 33 |
| Exp 1 | MOSPD3   | 64598  | 13122608  | 30 | 1 | 1 | 3.4 | 0.9 | 33 |
| Exp 1 | PICK1    | 9463   | 7110697   | 30 | 1 | 1 | 1.7 | 0.9 | 33 |
| Exp 1 | CFLAR    | 8837   | 187608585 | 30 | 1 | 1 | 5   | 0.6 | 33 |
| Exp 1 | KCNB2    | 9312   | 27436974  | 30 | 1 | 1 | 0.8 | 2.2 | 33 |
| Exp 1 | ZNF615   | 284370 | 313569854 | 30 | 1 | 1 | 2.4 | 0.9 | 33 |
| Exp 1 | CCDC111  | 201973 | 22749373  | 30 | 1 | 1 | 1.8 |     | 33 |
| Exp 1 | CCDC93   | 54520  | 82775371  | 29 | 1 | 1 | 1.9 | 2.2 | 33 |
| Exp 1 | PTCHD1   | 139411 | 148271104 | 29 | 1 | 1 | 0.8 | 4.4 | 33 |
| Exp 1 | CLSTN2   | 64084  | 209364544 | 29 | 1 | 1 | 1   |     | 33 |
| Exp 1 | EPB41L4A | 64097  | 87042275  | 29 | 1 | 1 | 1.6 | 1.9 | 33 |
| Exp 1 | WDR16    | 146845 | 124028510 | 29 | 1 | 1 | 1.4 | 1.6 | 33 |
| Exp 1 | ENOX1    | 55068  | 189027046 | 29 | 1 | 1 | 1.7 | 0.6 | 33 |
| Exp 1 | EHHADH   | 1962   | 261878539 | 29 | 1 | 1 | 1.1 | 2.2 | 33 |
| Exp 1 | TRIL     | 9865   | 76880480  | 29 | 1 | 1 | 1   | 0.9 | 33 |
| Exp 1 | MB21D2   | 151963 | 197333817 | 29 | 1 | 1 | 1.4 |     | 33 |
| Exp 1 | EIF5     | 1983   | 21361337  | 29 | 1 | 1 | 3   | 4.7 | 33 |
| Exp 1 | GPRASP1  | 9737   | 103472136 | 29 | 1 | 1 | 0.7 | 2.5 | 33 |
| Exp 1 | CDKN2AIP | 55602  | 8923040   | 29 | 1 | 1 | 2.1 | 1.6 | 33 |
| Exp 1 | THOP1    | 7064   | 4507491   | 29 | 1 | 1 | 1   | 2.2 | 33 |
| Exp 1 | ZNF296   | 162979 | 21687252  | 29 | 1 | 1 | 1.9 | 0.3 | 33 |
| Exp 1 | KIF25    | 3834   | 154124879 | 29 | 1 | 1 | 2.9 | 1.6 | 33 |
| Exp 1 | PDE11A   | 50940  | 116536083 | 29 | 1 | 1 | 2   | 0.9 | 33 |
| Exp 1 | AASDH    | 132949 | 45580730  | 29 | 1 | 1 | 0.8 | 1.6 | 33 |

|       |         |           |             |    |   |   |     |     |    |
|-------|---------|-----------|-------------|----|---|---|-----|-----|----|
| Exp 1 | HSPA12A | 259217    | 119874213   | 28 | 1 | 1 | 1.8 | 2.5 | 33 |
| Exp 1 | BBS10   | 79738     | 100816407   | 28 | 1 | 1 | 1.5 |     | 33 |
| Exp 1 | GPR158  | 57512     | 93204867    | 28 | 1 | 1 | 1.2 | 3.1 | 33 |
| Exp 1 | CDCA2   | 157313    | 44681484    | 28 | 1 | 1 | 1.1 | 3.8 | 33 |
| Exp 1 | PI4K2A  | 55361     | 13559514    | 28 | 1 | 1 | 2.1 | 1.9 | 33 |
| Exp 1 | POMT2   | 29954     | 32455271    | 28 | 1 | 1 | 1.1 | 0.9 | 33 |
| Exp 1 | NFE2L3  | 9603      | 225735557   | 28 | 1 | 1 | 1.2 | 0.9 | 33 |
| Exp 1 | ARMCX4  | 100131755 | 371877632   | 28 | 1 | 1 | 0.4 | 2.8 | 33 |
| Exp 1 | GAS2L1  | 10634     | 19923777    | 28 | 1 | 1 | 1.8 | 1.3 | 33 |
| Exp 1 | SYNPO2  | 171024    | 193083185   | 28 | 1 | 1 | 0.9 | 0.6 | 33 |
| Exp 1 | SEMA4D  | 10507     | 214010220   | 28 | 2 | 1 | 1.1 | 0.3 | 33 |
| Exp 1 | FAM194A | 131831    | 87298939    | 28 | 1 | 1 | 1.4 | 1.6 | 33 |
| Exp 1 | ZNF729  | 100287226 | 336455120   | 28 | 2 | 1 | 0.9 |     | 33 |
| Exp 1 | CNGB3   | 54714     | 116642889   | 28 | 1 | 1 | 1   | 1.3 | 33 |
| Exp 1 | BIRC3   | 330       | 4502139     | 28 | 1 | 1 | 1.3 | 1.3 | 33 |
| Exp 1 | PDE9A   | 5152      | 48762728    | 28 | 1 | 1 | 2.3 | 1.6 | 33 |
| Exp 1 | COL5A2  | 1290      | 89363017    | 28 | 1 | 1 | 0.5 | 3.5 | 33 |
| Exp 1 | MAP4K1  | 11184     | 6005810     | 27 | 1 | 1 | 0.8 | 0.6 | 33 |
| Exp 1 | DICER1  | 23405     | 307133775   | 27 | 1 | 1 | 0.5 | 2.5 | 33 |
| Exp 1 | ZNF251  | 90987     | 153792407   | 27 | 1 | 1 | 1.5 | 1.3 | 33 |
| Exp 1 | FNDC3A  | 22862     | 118918395   | 27 | 1 | 1 | 0.7 | 1.3 | 33 |
| Exp 1 | HERC5   | 51191     | 110825982   | 27 | 1 | 1 | 0.9 | 0.9 | 33 |
| Exp 1 | CRY2    | 1408      | 18853Exp 13 | 27 | 1 | 1 | 1.9 | 0.3 | 33 |
| Exp 1 | DPY19L2 | 283417    | 93277105    | 27 | 1 | 1 | 1.3 | 2.8 | 33 |
| Exp 1 | TUBGCP6 | 85378     | 56788364    | 27 | 1 | 1 | 0.4 | 3.8 | 33 |
| Exp 1 | ADCY1   | 107       | 31083193    | 27 | 1 | 1 | 0.6 | 2.5 | 33 |
| Exp 1 | NBEAL2  | 23218     | 149944548   | 27 | 1 | 1 | 0.4 |     | 33 |
| Exp 1 | TUBGCP2 | 10844     | 375298717   | 27 | 1 | 1 | 0.9 | 3.5 | 33 |
| Exp 1 | ZNRF3   | 84133     | 150378447   | 27 | 1 | 1 | 0.8 |     | 33 |
| Exp 1 | PAK1    | 5058      | 42794769    | 27 | 1 | 1 | 1.5 | 0.3 | 33 |
| Exp 1 | SLFN13  | 146857    | 56119108    | 26 | 1 | 1 | 1.7 | 0.6 | 33 |
| Exp 1 | RP1     | Exp 11    | 5454016     | 26 | 1 | 1 | 0.5 | 3.8 | 33 |
| Exp 1 | KIF13B  | 23303     | 46852172    | 26 | 1 | 1 | 0.7 | 4.7 | 33 |
| Exp 1 | PIWIL4  | 143689    | 221316711   | 26 | 1 | 1 | 1.2 | 0.3 | 33 |
| Exp 1 | HMMR    | 3161      | 217272804   | 26 | 1 | 1 | 1.4 | 4.4 | 33 |
| Exp 1 | PTPRQ   | 374462    | 222537743   | 26 | 1 | 1 | 0.3 | 4.4 | 33 |
| Exp 1 | PTPDC1  | 138639    | 30089952    | 26 | 1 | 1 | 0.9 | 2.2 | 33 |
| Exp 1 | PLCE1   | 51196     | 260166694   | 25 | 1 | 1 | 0.4 | 3.8 | 33 |
| Exp 1 | DUSP27  | 92235     | 122937243   | 25 | 1 | 1 | 0.9 | 2.2 | 33 |
| Exp 1 | MAGI2   | 9863      | 27436957    | 25 | 1 | 1 | 0.8 | 2.8 | 33 |
| Exp 1 | MAP3K14 | 9020      | 115298645   | 25 | 1 | 1 | 2.1 | 1.9 | 33 |

|       |              |           |           |    |   |   |      |     |    |
|-------|--------------|-----------|-----------|----|---|---|------|-----|----|
| Exp 1 | AKNA         | 80709     | 151301137 | 25 | 1 | 1 | 1    | 1.9 | 33 |
| Exp 1 | KIAA0753     | 9851      | 154689847 | 25 | 1 | 1 | 1    | 3.1 | 33 |
| Exp 1 | DNAH6        | 1768      | 194353966 | 24 | 1 | 1 | 0.3  | 4.4 | 33 |
| Exp 1 | SETX         | 23064     | 113722133 | 24 | 1 | 1 | 0.3  | 4.7 | 33 |
| Exp 1 | FRAS1        | 80144     | 256000767 | 23 | 2 | 1 | 0.2  | 3.1 | 33 |
| Exp 2 | CHD9         | 80205     | 95147342  | 63 | 2 | 2 | 0.8  | 4.4 | 33 |
| Exp 2 | LOC100288562 | 100288562 | 239743602 | 61 | 2 | 1 | 3.1  |     | 33 |
| Exp 2 | KIFC1        | 3833      | 167555110 | 58 | 2 | 2 | 2.2  | 2.2 | 33 |
| Exp 2 | BRSK1        | 84446     | 24308326  | 57 | 2 | 1 | 1.8  | 3.1 | 33 |
| Exp 2 | KRT85        | 3891      | 4504935   | 56 | 2 | 1 | 3.7  | 4.1 | 33 |
| Exp 2 | DIXDC1       | 85458     | 83816971  | 54 | 2 | 1 | 3.5  | 1.6 | 33 |
| Exp 2 | CSPP1        | 79848     | 116174778 | 53 | 2 | 1 | 1    | 3.8 | 33 |
| Exp 2 | MICB         | 4277      | 167857788 | 53 | 1 | 1 | 2.9  | 1.3 | 33 |
| Exp 2 | HLA-DPA1     | 3113      | 24797074  | 51 | 2 | 1 | 2.7  |     | 33 |
| Exp 2 | VEZT         | 55591     | 155030244 | 49 | 1 | 1 | 1    | 0.3 | 33 |
| Exp 2 | GABRD        | 2563      | 34734071  | 48 | 1 | 1 | 2.2  | 0.3 | 33 |
| Exp 2 | OR51M1       | 390059    | 284005410 | 46 | 1 | 1 | 1.8  | 0.3 | 33 |
| Exp 2 | CTBP1        | 1487      | 4557497   | 42 | 1 | 1 | 1.8  | 1.9 | 33 |
| Exp 2 | GET4         | 51608     | 38570062  | 40 | 2 | 1 | 3.7  | 2.8 | 33 |
| Exp 2 | KRT222       | 125113    | 22748757  | 40 | 1 | 1 | 2.4  | 4.7 | 33 |
| Exp 2 | S100A8       | 6279      | 21614544  | 40 | 1 | 1 | 22.6 | 4.4 | 33 |
| Exp 2 | KLK11        | 11012     | 5803199   | 40 | 1 | 1 | 6    | 0.3 | 33 |
| Exp 2 | FAM167A      | 83648     | 170784820 | 38 | 1 | 1 | 3.3  | 0.9 | 33 |
| Exp 2 | GHSR         | 2693      | 38455410  | 38 | 2 | 1 | 1.9  | 0.3 | 33 |
| Exp 2 | MED4         | 29079     | 7661788   | 38 | 2 | 1 | 3    | 0.9 | 33 |
| Exp 2 | ADARB1       | 104       | 4501919   | 37 | 1 | 1 | 1    | 1.9 | 33 |
| Exp 2 | AKR1B10      | 57016     | 223468663 | 37 | 1 | 1 | 4.1  |     | 33 |
| Exp 2 | ZFYVE9       | 9372      | 6552337   | 37 | 1 | 1 | 1.2  | 1.6 | 33 |
| Exp 2 | GALNT13      | 114805    | 145309313 | 37 | 1 | 1 | 2.7  | 2.5 | 33 |
| Exp 2 | MINPP1       | 9562      | 296010986 | 36 | 1 | 1 | 2.2  | 0.6 | 33 |
| Exp 2 | INSL6        | 11172     | 38569396  | 35 | 1 | 1 | 5.2  | 0.6 | 33 |
| Exp 2 | FLJ27352     | 145788    | 311771669 | 35 | 1 | 1 | 5.8  |     | 33 |
| Exp 2 | CREG2        | 200407    | 24475869  | 35 | 4 | 1 | 2.8  |     | 33 |
| Exp 2 | FMO4         | 2329      | 4503Exp 3 | 35 | 1 | 1 | 2.3  | 0.3 | 33 |
| Exp 2 | ZNF488       | 118738    | 23308499  | 35 | 1 | 1 | 3.8  | 0.3 | 33 |
| Exp 2 | FAM90A1      | 55138     | 144953905 | 35 | 4 | 1 | 1.7  | 0.3 | 33 |
| Exp 2 | UGDH         | 7358      | 296040438 | 35 | 3 | 1 | 2.3  | 2.5 | 33 |
| Exp 2 | C1orf110     | 339512    | 148806888 | 35 | 1 | 1 | 2.6  | 0.3 | 33 |
| Exp 2 | CYP20A1      | 57404     | 29171730  | 34 | 1 | 1 | 1.7  |     | 33 |
| Exp 2 | LIPC         | 3990      | 194097335 | 34 | 1 | 1 | 1.8  | 0.9 | 33 |
| Exp 2 | TRMT112      | 51504     | 7705477   | 34 | 1 | 1 | 8    | 4.1 | 33 |

|       |           |        |           |    |   |   |      |     |    |
|-------|-----------|--------|-----------|----|---|---|------|-----|----|
| Exp 2 | ZNF37A    | 7587   | 55769566  | 34 | 1 | 1 | 2    | 0.3 | 33 |
| Exp 2 | HIVEP2    | 3097   | 110347463 | 34 | 1 | 1 | 0.4  | 3.5 | 33 |
| Exp 2 | C6orf52   | 347744 | 222537721 | 34 | 1 | 1 | 5.9  |     | 33 |
| Exp 2 | FBXO45    | 200933 | 157743247 | 34 | 1 | 1 | 2.4  | 1.9 | 33 |
| Exp 2 | LRRC37B   | 114659 | 53829385  | 33 | 1 | 1 | 0.7  | 0.6 | 33 |
| Exp 2 | SLC35C1   | 55343  | 223671917 | 32 | 1 | 1 | 5.7  | 0.6 | 33 |
| Exp 2 | NISCH     | 11188  | 66472382  | 32 | 3 | 1 | 0.6  | 2.2 | 33 |
| Exp 2 | STRA6     | 64220  | 217330578 | 32 | 1 | 1 | 1.6  | 1.6 | 33 |
| Exp 2 | SLC4A5    | 57835  | 19743827  | 32 | 1 | 1 | 0.7  | 2.5 | 33 |
| Exp 2 | MFN1      | 55669  | 45269137  | 32 | 2 | 1 | 1.1  |     | 33 |
| Exp 2 | GOLM1     | 51280  | 29550838  | 32 | 1 | 1 | 1.7  | 0.3 | 33 |
| Exp 2 | FUT7      | 2529   | 4758406   | 32 | 1 | 1 | 2.6  | 0.3 | 33 |
| Exp 2 | TRPV3     | 162514 | 21735483  | 32 | 1 | 1 | 1.5  | 0.3 | 33 |
| Exp 2 | GNG2      | 54331  | 54114974  | 32 | 1 | 1 | 15.5 | 1.9 | 33 |
| Exp 2 | FAM22G    | 441457 | 113865921 | 32 | 1 | 1 | 2.2  | 0.6 | 33 |
| Exp 2 | BLNK      | 29760  | 386268028 | 32 | 1 | 1 | 2    | 1.6 | 33 |
| Exp 2 | EDN2      | 1907   | 4503463   | 32 | 1 | 1 | 4.5  |     | 33 |
| Exp 2 | LRP4      | 4038   | 157384998 | 32 | 2 | 1 | 0.5  | 2.2 | 33 |
| Exp 2 | LOC729626 | 729626 | 113428298 | 32 | 1 | 1 | 10.9 |     | 33 |
| Exp 2 | DNPEP     | 23549  | 156416028 | 32 | 1 | 1 | 2.5  | 0.9 | 33 |
| Exp 2 | SLIT1     | 6585   | 188528675 | 31 | 1 | 1 | 0.5  | 0.6 | 33 |
| Exp 2 | CEPT1     | 10390  | 5174415   | 31 | 1 | 1 | 1.7  | 1.9 | 33 |
| Exp 2 | C19orf35  | 374872 | 38348368  | 31 | 1 | 1 | 1.7  | 0.3 | 33 |
| Exp 2 | PNISR     | 25957  | 154146193 | 31 | 1 | 1 | 1.6  | 4.1 | 33 |
| Exp 2 | CHST3     | 9469   | 19923281  | 31 | 1 | 1 | 2.1  | 1.6 | 33 |
| Exp 2 | PLXDC2    | 84898  | 40255005  | 31 | 1 | 1 | 1.9  | 0.6 | 33 |
| Exp 2 | KIAA1383  | 54627  | 149192843 | 31 | 1 | 1 | 1.1  | 1.6 | 33 |
| Exp 2 | LRRC3B    | 116135 | 16418445  | 31 | 1 | 1 | 3.5  |     | 33 |
| Exp 2 | SYNM      | 23336  | 112382237 | 31 | 1 | 1 | 0.7  | 4.7 | 33 |
| Exp 2 | CCDC159   | 126075 | 209969682 | 31 | 1 | 1 | 3.4  |     | 33 |
| Exp 2 | SERP1     | 27230  | 7657552   | 31 | 1 | 1 | 10.6 |     | 33 |
| Exp 2 | DMBT1     | 1755   | 341913704 | 31 | 1 | 1 | 1    | 1.3 | 33 |
| Exp 2 | SORBS2    | 8470   | 224586855 | 30 | 1 | 1 | 1.4  | 1.3 | 33 |
| Exp 2 | LRRC8C    | 84230  | 19923729  | 30 | 1 | 1 | 1.2  | 2.5 | 33 |
| Exp 2 | MPEG1     | 219972 | 133505169 | 30 | 1 | 1 | 1.3  | 3.5 | 33 |
| Exp 2 | VASH1     | 22846  | 7662454   | 30 | 1 | 1 | 2.7  | 0.9 | 33 |
| Exp 2 | TSEN2     | 80746  | 223972638 | 30 | 1 | 1 | 2.2  |     | 33 |
| Exp 2 | OTUD7A    | 161725 | 18702331  | 30 | 1 | 1 | 1.4  | 1.3 | 33 |
| Exp 2 | TBX22     | 50945  | 18375603  | 30 | 1 | 1 | 2.1  | 0.3 | 33 |
| Exp 2 | GUCY1A3   | 2982   | 194595478 | 30 | 1 | 1 | 1.8  | 1.6 | 33 |
| Exp 2 | FAM187B   | 148109 | 22749005  | 30 | 1 | 1 | 1.6  |     | 33 |

|       |          |           |             |    |   |   |     |     |    |
|-------|----------|-----------|-------------|----|---|---|-----|-----|----|
| Exp 2 | PTCH2    | 8643      | 52145305    | 30 | 1 | 1 | 0.7 | 0.6 | 33 |
| Exp 2 | HEATR5A  | 25938     | 327365361   | 30 | 1 | 1 | 0.5 | 0.9 | 33 |
| Exp 2 | RANBP6   | 26953     | 342349354   | 29 | 1 | 1 | 1.5 | 1.9 | 33 |
| Exp 2 | ZNF783   | 100289678 | 30464Exp 35 | 29 | 1 | 1 | 3.1 |     | 33 |
| Exp 2 | ABCA10   | 10349     | 153792144   | 29 | 1 | 1 | 0.5 | 2.2 | 33 |
| Exp 2 | CEP112   | 201134    | 82880654    | 29 | 1 | 1 | 5.2 | 2.8 | 33 |
| Exp 2 | RLIM     | 51132     | 34452684    | 29 | 1 | 1 | 1.6 | 2.2 | 33 |
| Exp 2 | LAMA5    | 3911      | 21264602    | 29 | 1 | 1 | 0.3 | 4.1 | 33 |
| Exp 2 | SP100    | 6672      | 122939208   | 29 | 1 | 1 | 1.2 | 1.6 | 33 |
| Exp 2 | IFI44    | 10561     | 166706911   | 29 | 1 | 1 | 2.3 | 1.6 | 33 |
| Exp 2 | IL16     | 3603      | 27262655    | 29 | 1 | 1 | 1   | 3.5 | 33 |
| Exp 2 | ADNP     | 23394     | 12229217    | 29 | 1 | 1 | 0.8 | 0.9 | 33 |
| Exp 2 | DDR1     | 780       | 321400059   | 29 | 1 | 1 | 1.6 | 0.6 | 33 |
| Exp 2 | KCNK3    | 3777      | 4504849     | 29 | 1 | 1 | 3.3 |     | 33 |
| Exp 2 | APTX     | 54840     | 305410835   | 28 | 1 | 1 | 2.7 | 0.6 | 33 |
| Exp 2 | EZH1     | 2145      | 19923202    | 28 | 1 | 1 | 1.5 | 1.3 | 33 |
| Exp 2 | SLITRK2  | 84631     | 33504581    | 28 | 1 | 1 | 1.4 | 0.3 | 33 |
| Exp 2 | KDM2B    | 84678     | 54112382    | 28 | 1 | 1 | 0.7 | 4.1 | 33 |
| Exp 2 | ATP8B3   | 148229    | 295821170   | 28 | 2 | 1 | 0.5 | 1.9 | 33 |
| Exp 2 | PTPRC    | 5788      | 18641347    | 28 | 1 | 1 | 0.5 | 1.9 | 33 |
| Exp 2 | CHST9    | 83539     | 116235458   | 28 | 1 | 1 | 2.3 | 0.3 | 33 |
| Exp 2 | ITGAV    | 3685      | 223468597   | 28 | 1 | 1 | 0.8 | 0.6 | 33 |
| Exp 2 | SHB      | 6461      | 106879210   | 27 | 1 | 1 | 1.4 | 1.6 | 33 |
| Exp 2 | INSR     | 3643      | 119395736   | 27 | 1 | 1 | 0.7 | 1.9 | 33 |
| Exp 2 | MCF2L2   | 23101     | 31742505    | 27 | 1 | 1 | 1.2 | 1.9 | 33 |
| Exp 2 | ZFH3     | 463       | 258613987   | 27 | 1 | 1 | 0.4 | 2.8 | 33 |
| Exp 2 | GPRASP2  | 114928    | 19923967    | 27 | 1 | 1 | 0.8 | 2.2 | 33 |
| Exp 2 | MAP3K10  | 4294      | 21735550    | 27 | 1 | 1 | 1.2 | 0.9 | 33 |
| Exp 2 | GPATCH8  | 23131     | 50962882    | 27 | 1 | 1 | 0.5 | 4.7 | 33 |
| Exp 2 | NRXN2    | 9379      | 14211536    | 27 | 1 | 1 | 0.6 | 1.9 | 33 |
| Exp 2 | PPP1R7   | 5510      | 4506013     | 27 | 2 | 1 | 1.9 | 3.5 | 33 |
| Exp 2 | SHPRH    | 257218    | 27436873    | 26 | 3 | 1 | 0.4 | 3.1 | 33 |
| Exp 2 | HEATR7B2 | 133558    | 154240671   | 26 | 1 | 1 | 0.4 | 2.8 | 33 |
| Exp 2 | C7orf63  | 79846     | 236463164   | 26 | 1 | 1 | 3.6 | 1.3 | 33 |
| Exp 2 | BRD1     | 23774     | 11321642    | 26 | 1 | 1 | 1.1 | 2.2 | 33 |
| Exp 2 | ARID4A   | 5926      | 115334673   | 26 | 1 | 1 | 0.8 | 3.5 | 33 |
| Exp 2 | AGAP10   | 728127    | 239744064   | 26 | 1 | 1 | 1.6 | 0.6 | 33 |
| Exp 2 | CUL9     | 23113     | 24307991    | 25 | 1 | 1 | 0.3 | 4.4 | 33 |
| Exp 2 | DOCK3    | 1795      | 31415870    | 25 | 1 | 1 | 0.4 | 1.9 | 33 |
| Exp 2 | DENND3   | 22898     | 50345870    | 25 | 1 | 1 | 1.3 | 1.9 | 33 |
| Exp 2 | COBL     | 23242     | 31581524    | 25 | 1 | 1 | 0.9 | 3.1 | 33 |

|       |              |           |           |     |   |   |     |     |    |
|-------|--------------|-----------|-----------|-----|---|---|-----|-----|----|
| Exp 2 | GRIN2B       | 2904      | 167003331 | 25  | 1 | 1 | 0.6 | 2.2 | 33 |
| Exp 2 | ZZEF1        | 23140     | 73747881  | 24  | 1 | 1 | 0.3 | 3.1 | 33 |
| Exp 3 | TRIM27       | 5987      | 5730009   | 103 | 3 | 3 | 7.2 | 3.8 | 33 |
| Exp 3 | PDCD1LG2     | 80380     | 190014605 | 75  | 6 | 2 | 7.3 |     | 33 |
| Exp 3 | KLHL24       | 54800     | 40018614  | 73  | 3 | 1 | 2.8 | 4.4 | 33 |
| Exp 3 | GAL3ST4      | 79690     | 31542835  | 66  | 2 | 1 | 4.3 | 2.5 | 33 |
| Exp 3 | CCDC164      | 92749     | 217416374 | 64  | 5 | 1 | 2.3 |     | 33 |
| Exp 3 | BLM          | 641       | 4557365   | 63  | 3 | 2 | 1.6 | 4.1 | 33 |
| Exp 3 | ZNF318       | 24149     | 120587019 | 63  | 2 | 1 | 0.6 | 4.7 | 33 |
| Exp 3 | PKHD1L1      | 93035     | 126116589 | 60  | 3 | 1 | 0.4 | 2.5 | 33 |
| Exp 3 | CC2D2A       | 57545     | 197209974 | 56  | 2 | 1 | 1   | 3.5 | 33 |
| Exp 3 | PRKCQ        | 5588      | 334848126 | 55  | 2 | 1 | 1.1 | 0.3 | 33 |
| Exp 3 | GPR98        | 84059     | 113722120 | 55  | 2 | 1 | 0.3 | 3.8 | 33 |
| Exp 3 | CEP164       | 22897     | 115648142 | 54  | 2 | 1 | 1   | 4.4 | 33 |
| Exp 3 | CCDC132      | 55Exp 1   | 384229074 | 52  | 3 | 1 | 1.7 | 1.9 | 33 |
| Exp 3 | SYNRG        | 11276     | 254587994 | 52  | 1 | 1 | 1.9 | 2.5 | 33 |
| Exp 3 | TRIM37       | 4591      | 15147333  | 51  | 2 | 1 | 3.9 | 3.1 | 33 |
| Exp 3 | WDR19        | 57728     | 55743151  | 48  | 1 | 1 | 0.8 | 1.6 | 33 |
| Exp 3 | HCAR3        | 8843      | 157738694 | 44  | 5 | 1 | 2.8 | 0.3 | 33 |
| Exp 3 | SNTG2        | 54221     | 259155293 | 43  | 1 | 1 | 1.5 | 1.3 | 33 |
| Exp 3 | SDCCAG3      | 10807     | 89353278  | 42  | 1 | 1 | 2.7 | 3.8 | 33 |
| Exp 3 | C8orf58      | 541565    | 311771787 | 42  | 2 | 1 | 3   | 0.9 | 33 |
| Exp 3 | TMEM86B      | 255043    | 281427107 | 42  | 4 | 1 | 4.9 |     | 33 |
| Exp 3 | SH3RF2       | 153769    | 222446607 | 41  | 1 | 1 | 1   | 3.5 | 33 |
| Exp 3 | GRIK5        | 2901      | 29029597  | 40  | 1 | 1 | 4.7 | 0.6 | 33 |
| Exp 3 | ZNF669       | 79862     | 217035140 | 40  | 2 | 1 | 1.9 | 0.3 | 33 |
| Exp 3 | ANO5         | 203859    | 47106048  | 40  | 2 | 1 | 1   | 0.6 | 33 |
| Exp 3 | TFEB         | 7942      | 24307933  | 38  | 1 | 1 | 1.5 | 0.9 | 33 |
| Exp 3 | PLD4         | 122618    | 94681038  | 38  | 1 | 1 | 1.6 | 0.6 | 33 |
| Exp 3 | KIAA1377     | 57562     | 115387118 | 38  | 1 | 1 | 0.8 | 1.3 | 33 |
| Exp 3 | LOC100288814 | 100288814 | 304307742 | 38  | 1 | 1 | 4.7 |     | 33 |
| Exp 3 | TOR3A        | 64222     | 115647957 | 37  | 1 | 1 | 2   | 0.3 | 33 |
| Exp 3 | DDAH1        | 23576     | 197313763 | 37  | 1 | 1 | 3.8 | 2.8 | 33 |
| Exp 3 | LOC100507588 | 100507588 | 305410860 | 36  | 1 | 1 | 2.5 |     | 33 |
| Exp 3 | GRIN2A       | 2903      | 197313638 | 36  | 1 | 1 | 1.1 | 2.2 | 33 |
| Exp 3 | RSG1         | 79363     | 241666479 | 36  | 1 | 1 | 3.5 | 0.3 | 33 |
| Exp 3 | ZNF187       | 7741      | 161353481 | 36  | 1 | 1 | 2.3 | 0.3 | 33 |
| Exp 3 | KRT23        | 25984     | 27894339  | 36  | 1 | 1 | 1.9 | 1.9 | 33 |
| Exp 3 | OVOS         | 408186    | 341914879 | 36  | 1 | 1 | 2.5 | 0.3 | 33 |
| Exp 3 | GCGR         | 2642      | 4503947   | 36  | 1 | 1 | 1.7 | 0.6 | 33 |
| Exp 3 | KCNJ1        | 3758      | 24497467  | 36  | 2 | 1 | 3.2 | 0.3 | 33 |

|       |          |           |           |    |   |   |     |     |    |
|-------|----------|-----------|-----------|----|---|---|-----|-----|----|
| Exp 3 | OR4M2    | 390538    | 284005443 | 36 | 1 | 1 | 3.8 |     | 33 |
| Exp 3 | MLC1     | 23209     | 14589896  | 35 | 1 | 1 | 3.4 | 0.6 | 33 |
| Exp 3 | TRMT2A   | 27037     | 384229064 | 35 | 1 | 1 | 1.2 | 1.3 | 33 |
| Exp 3 | KNDC1    | 85442     | 116268127 | 35 | 1 | 1 | 0.4 | 4.4 | 33 |
| Exp 3 | BST1     | 683       | 168229159 | 35 | 2 | 1 | 4.7 | 0.6 | 33 |
| Exp 3 | FGF16    | 8823      | 4503691   | 35 | 1 | 1 | 3.4 |     | 33 |
| Exp 3 | KIR2DS2  | 100132285 | 341916324 | 35 | 1 | 1 | 6.8 |     | 33 |
| Exp 3 | PCIF1    | 63935     | 18034767  | 35 | 1 | 1 | 1   | 1.9 | 33 |
| Exp 3 | C5orf25  | 375484    | 196259796 | 35 | 1 | 1 | 1.5 | 0.3 | 33 |
| Exp 3 | POP7     | 10248     | 153791431 | 35 | 1 | 1 | 8.6 | 1.6 | 33 |
| Exp 3 | USP43    | 124739    | 148612811 | 35 | 1 | 1 | 1.3 | 1.9 | 33 |
| Exp 3 | ARSG     | 22901     | 45430057  | 35 | 1 | 1 | 3   | 0.3 | 33 |
| Exp 3 | TPSAB1   | 7177      | 13775595  | 35 | 3 | 1 | 2.9 | 0.3 | 33 |
| Exp 3 | HDAC11   | 79885     | 209862883 | 34 | 1 | 1 | 2.4 | 0.6 | 33 |
| Exp 3 | SLC35F2  | 54733     | 31542943  | 34 | 1 | 1 | 2.9 |     | 33 |
| Exp 3 | OR2T35   | 403244    | 49226830  | 34 | 1 | 1 | 2.5 | 2.8 | 33 |
| Exp 3 | ZNF497   | 162968    | 333033771 | 34 | 1 | 1 | 1.8 | 0.3 | 33 |
| Exp 3 | VAV1     | 7409      | 384551646 | 34 | 1 | 1 | 0.9 |     | 33 |
| Exp 3 | CASP6    | 839       | 14916485  | 34 | 1 | 1 | 2.9 |     | 33 |
| Exp 3 | MPV17L2  | 84769     | 116235468 | 33 | 4 | 1 | 3.9 | 0.3 | 33 |
| Exp 3 | ZNF407   | 55628     | 226246537 | 33 | 1 | 1 | 0.5 | 1.9 | 33 |
| Exp 3 | FAM186B  | 84070     | 14149789  | 33 | 2 | 1 | 1   | 1.6 | 33 |
| Exp 3 | MAGEC1   | 9947      | 58530876  | 33 | 1 | 1 | 0.6 | 0.3 | 33 |
| Exp 3 | CCDC48   | 79825     | 228008351 | 33 | 1 | 1 | 1.7 | 1.3 | 33 |
| Exp 3 | CDK4     | 1019      | 4502735   | 33 | 1 | 1 | 4.3 | 4.7 | 33 |
| Exp 3 | ZBED5    | 58486     | 49574210  | 32 | 1 | 1 | 1.3 | 1.6 | 33 |
| Exp 3 | CYP11B1  | 1584      | 71067343  | 32 | 2 | 1 | 1.8 | 0.3 | 33 |
| Exp 3 | ZMYM3    | 9203      | 4827067   | 32 | 1 | 1 | 0.9 | 3.1 | 33 |
| Exp 3 | OSCP1    | 127700    | 268370167 | 32 | 1 | 1 | 2.4 | 0.6 | 33 |
| Exp 3 | GPR124   | 25960     | 300934750 | 32 | 1 | 1 | 0.8 | 1.3 | 33 |
| Exp 3 | SALL3    | 27164     | 154146199 | 32 | 1 | 1 | 0.9 | 0.9 | 33 |
| Exp 3 | TNFRSF8  | 943       | 68348711  | 32 | 1 | 1 | 1.8 | 0.3 | 33 |
| Exp 3 | ANKRD34B | 340120    | 257467559 | 32 | 1 | 1 | 2.1 |     | 33 |
| Exp 3 | SOWAHB   | 345079    | 71274172  | 32 | 1 | 1 | 0.9 | 1.6 | 33 |
| Exp 3 | EXPH5    | 23086     | 221316747 | 32 | 2 | 1 | 0.5 | 2.5 | 33 |
| Exp 3 | VIPR1    | 7433      | 353523865 | 32 | 1 | 1 | 5.7 |     | 33 |
| Exp 3 | PAH      | 5053      | 4557819   | 32 | 1 | 1 | 4   |     | 33 |
| Exp 3 | RALGAPA2 | 57186     | 118600961 | 32 | 5 | 1 | 0.5 | 2.8 | 33 |
| Exp 3 | FAM83H   | 286077    | 157311635 | 32 | 2 | 1 | 0.8 | 1.3 | 33 |
| Exp 3 | AZU1     | 566       | 11342670  | 32 | 1 | 1 | 4   |     | 33 |
| Exp 3 | BUB1     | 699       | 4757878   | 32 | 1 | 1 | 0.6 | 1.3 | 33 |



|       |          |        |            |    |   |   |     |     |    |
|-------|----------|--------|------------|----|---|---|-----|-----|----|
| Exp 3 | KIF2C    | 11004  | 166795250  | 32 | 1 | 1 | 5.4 | 1.3 | 33 |
| Exp 3 | DIP2B    | 57609  | 55749758   | 32 | 1 | 1 | 0.5 | 2.5 | 33 |
| Exp 3 | TYSND1   | 219743 | 94400921   | 32 | 1 | 1 | 1.9 | 0.6 | 33 |
| Exp 3 | TTC17    | 55761  | 21361787   | 32 | 1 | 1 | 0.7 | 4.1 | 33 |
| Exp 3 | RFPL4A   | 342931 | 222446629  | 32 | 2 | 1 | 2.8 | 0.6 | 33 |
| Exp 3 | C18orf21 | 83608  | 319918864  | 32 | 1 | 1 | 6.2 |     | 33 |
| Exp 3 | PITX2    | 5308   | 24234708   | 32 | 1 | 1 | 4.7 | 0.6 | 33 |
| Exp 3 | ZNF644   | 84146  | 41152093   | 31 | 1 | 1 | 0.8 | 1.9 | 33 |
| Exp 3 | GP2      | 2813   | 119220572  | 31 | 1 | 1 | 3.1 | 1.3 | 33 |
| Exp 3 | LRP6     | 4040   | 148727288  | 31 | 1 | 1 | 0.6 | 2.2 | 33 |
| Exp 3 | ALAS2    | 212    | 83977440   | 31 | 1 | 1 | 1.8 | 2.2 | 33 |
| Exp 3 | ADAMTS17 | 170691 | 110611170  | 31 | 1 | 1 | 0.6 | 1.3 | 33 |
| Exp 3 | TMEM165  | 55858  | 32189371   | 31 | 1 | 1 | 2.8 | 3.8 | 33 |
| Exp 3 | POTED    | 317754 | 153792284  | 31 | 1 | 1 | 1.7 | 0.6 | 33 |
| Exp 3 | PRKD2    | 25865  | 120659787  | 31 | 1 | 1 | 1.5 | 1.3 | 33 |
| Exp 3 | WIPF2    | 147179 | 18959210   | 31 | 1 | 1 | 2.3 | 1.6 | 33 |
| Exp 3 | LPCAT4   | 254531 | 87116681   | 31 | 1 | 1 | 8.2 | 1.9 | 33 |
| Exp 3 | ZFPL1    | 7542   | 33300635   | 31 | 1 | 1 | 3.5 | 0.3 | 33 |
| Exp 3 | PRDM9    | 56979  | 147905620  | 31 | 1 | 1 | 1.1 | 0.3 | 33 |
| Exp 3 | HLA-DMB  | 3109   | 301129275  | 31 | 1 | 1 | 2.7 |     | 33 |
| Exp 3 | GOLGA8H  | 728498 | 239745132  | 31 | 1 | 1 | 1.7 | 1.9 | 33 |
| Exp 3 | CCDC84   | 338657 | 38348292   | 31 | 1 | 1 | 2.7 | 0.3 | 33 |
| Exp 3 | C12orf70 | 341346 | 222446616  | 30 | 1 | 1 | 2   | 0.9 | 33 |
| Exp 3 | IFITM2   | 10581  | 151101191  | 30 | 1 | 1 | 6.1 |     | 33 |
| Exp 3 | AMIGO1   | 57463  | 153791466  | 30 | 1 | 1 | 1.8 | 1.6 | 33 |
| Exp 3 | FAM75A7  | 26165  | 153791826  | 30 | 1 | 1 | 0.8 | 0.3 | 33 |
| Exp 3 | RRP7A    | 27341  | 25092725   | 30 | 1 | 1 | 4.6 | 1.6 | 33 |
| Exp 3 | WNT5A    | 7474   | 40806205   | 30 | 1 | 1 | 2.9 | 0.3 | 33 |
| Exp 3 | STAT6    | 6778   | 296010868  | 30 | 1 | 1 | 1.1 | 4.1 | 33 |
| Exp 3 | VPS26A   | 9559   | 17978519   | 30 | 1 | 1 | 2.4 | 2.5 | 33 |
| Exp 3 | DLEU7    | 220107 | 148747397  | 30 | 1 | 1 | 7.5 | 0.3 | 33 |
| Exp 3 | HTR3B    | 9177   | 5174469    | 30 | 1 | 1 | 2.9 |     | 33 |
| Exp 3 | SH2D3A   | 10045  | 208609985  | 30 | 1 | 1 | 1.9 | 1.6 | 33 |
| Exp 3 | LRP10    | 26020  | 32490559   | 30 | 2 | 1 | 1.8 | 2.5 | 33 |
| Exp 3 | KRIT1    | 889    | 31581522   | 30 | 1 | 1 | 1.2 | 3.8 | 33 |
| Exp 3 | SLC25A22 | 79751  | 133Exp 383 | 30 | 1 | 1 | 2.5 | 3.5 | 33 |
| Exp 3 | RAB3C    | 115827 | 19923985   | 30 | 1 | 1 | 6.2 | 2.2 | 33 |
| Exp 3 | ATOH8    | 84913  | 226498192  | 30 | 1 | 1 | 2.5 | 2.5 | 33 |
| Exp 3 | KLHL15   | 80311  | 226442729  | 29 | 1 | 1 | 1.8 | 3.1 | 33 |
| Exp 3 | C1orf135 | 79000  | 13128990   | 29 | 1 | 1 | 2.8 | 0.3 | 33 |
| Exp 3 | FRMD4B   | 23150  | 150010540  | 29 | 1 | 1 | 1.7 | 1.9 | 33 |

|       |          |        |           |    |   |   |     |     |    |
|-------|----------|--------|-----------|----|---|---|-----|-----|----|
| Exp 3 | ANKRD5   | 63926  | 38569426  | 29 | 1 | 1 | 1.3 | 2.5 | 33 |
| Exp 3 | NEK4     | 6787   | 302058308 | 29 | 1 | 1 | 1.3 | 0.9 | 33 |
| Exp 3 | ENTPD7   | 57089  | 9966821   | 29 | 1 | 1 | 1.7 | 0.3 | 33 |
| Exp 3 | IMPDH1   | 3614   | 34328928  | 29 | 1 | 1 | 1.2 | 3.1 | 33 |
| Exp 3 | PIAS2    | 9063   | 27532984  | 29 | 1 | 1 | 1.6 | 1.6 | 33 |
| Exp 3 | VSIG10   | 54621  | 40254891  | 29 | 1 | 1 | 3.5 | 0.9 | 33 |
| Exp 3 | PIGQ     | 9091   | 22538450  | 29 | 1 | 1 | 2.2 | 0.6 | 33 |
| Exp 3 | STK36    | 27148  | 217330634 | 29 | 1 | 1 | 0.8 |     | 33 |
| Exp 3 | MYC      | 4609   | 71774083  | 29 | 1 | 1 | 2.2 |     | 33 |
| Exp 3 | PARP2    | 10038  | 110825961 | 29 | 1 | 1 | 1.2 | 3.8 | 33 |
| Exp 3 | TMEM67   | 91147  | 214830753 | 29 | 1 | 1 | 1.4 | 2.2 | 33 |
| Exp 3 | C1orf65  | 164127 | 224593756 | 29 | 1 | 1 | 3   | 0.9 | 33 |
| Exp 3 | GDF10    | 2662   | 4826740   | 29 | 1 | 1 | 1.5 | 0.6 | 33 |
| Exp 3 | C6orf132 | 647024 | 256574805 | 29 | 1 | 1 | 1   | 2.2 | 33 |
| Exp 3 | DCC      | 1630   | 110431348 | 28 | 1 | 1 | 0.5 | 1.3 | 33 |
| Exp 3 | RAG1     | 5896   | 4557841   | 28 | 1 | 1 | 1.1 | 0.6 | 33 |
| Exp 3 | CACNA1C  | 775    | 193788528 | 28 | 2 | 1 | 0.4 | 1.3 | 33 |
| Exp 3 | POLR3E   | 55718  | 384475541 | 28 | 1 | 1 | 1.1 | 0.6 | 33 |
| Exp 3 | FGD6     | 55785  | 154240686 | 28 | 1 | 1 | 0.9 | 2.2 | 33 |
| Exp 3 | CNGA3    | 1261   | 4502917   | 28 | 2 | 1 | 1.7 | 1.3 | 33 |
| Exp 3 | DLG5     | 9231   | 95089461  | 28 | 1 | 1 | 0.4 | 2.2 | 33 |
| Exp 3 | NOS3     | 4846   | 40254422  | 28 | 1 | 1 | 0.7 | 1.3 | 33 |
| Exp 3 | PHLDB3   | 653583 | 157266264 | 28 | 1 | 1 | 1.2 | 1.3 | 33 |
| Exp 3 | NOD2     | 64127  | 11545912  | 28 | 1 | 1 | 1   | 1.9 | 33 |
| Exp 3 | MAPK1    | 5594   | 20986531  | 28 | 1 | 1 | 2.5 | 3.1 | 33 |
| Exp 3 | ABCB5    | 340273 | 255708477 | 28 | 1 | 1 | 1   | 2.8 | 33 |
| Exp 3 | SEC14L3  | 266629 | 27923592  | 28 | 1 | 1 | 2.2 | 0.3 | 33 |
| Exp 3 | SLC30A9  | 10463  | 57164948  | 28 | 1 | 1 | 1.9 | 1.6 | 33 |
| Exp 3 | IRF5     | 3663   | 334883190 | 28 | 1 | 1 | 2.2 | 0.3 | 33 |
| Exp 3 | OSMR     | 9180   | 4557040   | 28 | 1 | 1 | 1.5 | 0.6 | 33 |
| Exp 3 | ARHGEF18 | 23370  | 41327769  | 28 | 1 | 1 | 1.1 | 2.8 | 33 |
| Exp 3 | BMPER    | 168667 | 37693519  | 28 | 1 | 1 | 1.2 | 1.6 | 33 |
| Exp 3 | FAM178A  | 55719  | 150456436 | 28 | 1 | 1 | 0.8 | 4.1 | 33 |
| Exp 3 | PCDH17   | 27253  | 94538350  | 27 | 1 | 1 | 1.1 | 2.2 | 33 |
| Exp 3 | EIF2AK3  | 9451   | 134304838 | 27 | 1 | 1 | 1.2 | 2.5 | 33 |
| Exp 3 | MAP3K9   | 4293   | 52421790  | 27 | 2 | 1 | 0.7 | 2.2 | 33 |
| Exp 3 | PRSS23   | 11098  | 6005882   | 27 | 1 | 1 | 3.4 |     | 33 |
| Exp 3 | PPP1R26  | 9858   | 45387958  | 27 | 1 | 1 | 0.6 | 2.8 | 33 |
| Exp 3 | ADAMTS7  | 11173  | 38683827  | 27 | 2 | 1 | 0.5 | 1.6 | 33 |
| Exp 3 | SLC4A4   | 8671   | 4507025   | 27 | 1 | 1 | 1.7 | 1.9 | 33 |
| Exp 3 | PPP1R3A  | 5506   | 167614502 | 27 | 2 | 1 | 1.1 | 1.6 | 33 |

|       |           |         |             |    |   |   |     |     |    |
|-------|-----------|---------|-------------|----|---|---|-----|-----|----|
| Exp 3 | FRMPD4    | 9758    | 211971072   | 27 | 1 | 1 | 0.9 | 2.8 | 33 |
| Exp 3 | EBF4      | 5Exp 33 | 160333411   | 27 | 1 | 1 | 3.7 |     | 33 |
| Exp 3 | ATP10D    | 57205   | 222352161   | 27 | 1 | 1 | 0.9 | 2.2 | 33 |
| Exp 3 | RBM15B    | 29890   | 54607124    | 27 | 1 | 1 | 0.8 | 4.4 | 33 |
| Exp 3 | SMC1B     | 27127   | 71565160    | 27 | 1 | 1 | 0.5 | 3.1 | 33 |
| Exp 3 | PRDM8     | 56978   | 150378439   | 27 | 1 | 1 | 1.5 | 0.3 | 33 |
| Exp 3 | TUFT1     | 7286    | 9910596     | 27 | 1 | 1 | 3.3 | 0.6 | 33 |
| Exp 3 | PIK3R1    | 5295    | 32455248    | 27 | 1 | 1 | 4.4 | 1.3 | 33 |
| Exp 3 | MORC4     | 79710   | 145553971   | 27 | 1 | 1 | 1   | 0.9 | 33 |
| Exp 3 | ZFP106    | 64397   | 11968023    | 27 | 1 | 1 | 0.3 | 4.4 | 33 |
| Exp 3 | WRN       | 7486    | 110735439   | 26 | 1 | 1 | 0.9 | 4.7 | 33 |
| Exp 3 | C1orf87   | 127795  | 22748811    | 26 | 1 | 1 | 1.5 | 3.1 | 33 |
| Exp 3 | HEATR5B   | 54497   | 55749742    | 26 | 1 | 1 | 0.8 | 4.7 | 33 |
| Exp 3 | FCGBP     | 8857    | 154146262   | 26 | 1 | 1 | 0.1 | 1.6 | 33 |
| Exp 3 | PLCH1     | 23007   | 57863298    | 26 | 1 | 1 | 0.6 | 1.6 | 33 |
| Exp 3 | LRBA      | 987     | 345498499   | 26 | 1 | 1 | 0.4 | 3.8 | 33 |
| Exp 3 | APC2      | 10297   | 5031587     | 25 | 2 | 1 | 0.4 | 4.7 | 33 |
| Exp 3 | ANKRD20A1 | 84210   | 15Exp 14901 | 25 | 1 | 1 | 1.3 | 0.3 | 33 |
| Exp 3 | MUC5B     | 727897  | 301172750   | 25 | 1 | 1 | 0.2 | 1.6 | 33 |
| Exp 3 | RAPGEF2   | 9693    | 7657261     | 25 | 1 | 1 | 0.9 | 2.2 | 33 |
| Exp 3 | HTT       | 3064    | 90903231    | 25 | 1 | 1 | 1.2 | 2.2 | 33 |
| Exp 3 | MED12L    | 116931  | 93277088    | 24 | 1 | 1 | 0.3 | 3.1 | 33 |
